# Supplementary material for: Butyrate Alleviates Cytokine-Induced Barrier Dysfunction by Modifying Claudin-2 Levels
Source: PubMed Central journal article supplement (PMC8000923; doi:10.3390/biology10030205), 2021-03-09
Supplement: biology-10-00205-s001.pdf [file biology-10-00205-s001.pdf]

**Supplementary Figure S1. Full membranes of Western blotting for Figure 2.**

**Bands (Membranes) in the manuscript**

ImageQuant; AS 500 was used to capture chemiluminescence. Color picture and Monochrome pictures will be generated automatically. Monochrome pictures were analysed by ImageJ.

The membrane was cut in blotting, so ponceau staining was also shown here to confirm that pieces are from same membrane.

| Lane order: | Control | TNF- $\alpha$ /IFN- $\gamma$ 10ng/ml | TNF- $\alpha$ /IFN- $\gamma$ 10ng/ml+ acetate 2mM | TNF- $\alpha$ /IFN- $\gamma$ 10ng/ml+ propionat e 2mM | TNF- $\alpha$ /IFN- $\gamma$ 10ng/ml+ butyrate 2mM | TNF- $\alpha$ /IFN- $\gamma$ 10ng/ml+ succinat e 2mM | Control | TNF- $\alpha$ /IFN- $\gamma$ 10ng/ml | TNF- $\alpha$ /IFN- $\gamma$ 10ng/ml+ acetate 2mM | TNF- $\alpha$ /IFN- $\gamma$ 10ng/ml+ propionat e 2mM | TNF- $\alpha$ /IFN- $\gamma$ 10ng/ml+ butyrate 2mM | TNF- $\alpha$ /IFN- $\gamma$ 10ng/ml+ succinat e 2mM |
|-------------|---------|--------------------------------------|---------------------------------------------------|-------------------------------------------------------|----------------------------------------------------|------------------------------------------------------|---------|--------------------------------------|---------------------------------------------------|-------------------------------------------------------|----------------------------------------------------|------------------------------------------------------|
|-------------|---------|--------------------------------------|---------------------------------------------------|-------------------------------------------------------|----------------------------------------------------|------------------------------------------------------|---------|--------------------------------------|---------------------------------------------------|-------------------------------------------------------|----------------------------------------------------|------------------------------------------------------|

Ponceau S staining

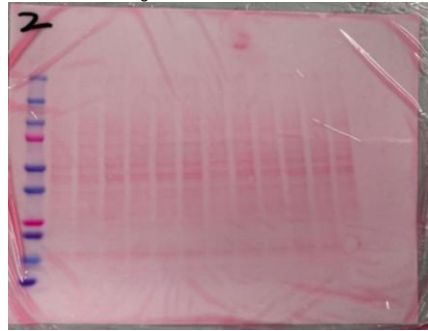

GAPDH ~36kDa Rabbit CST 5174S

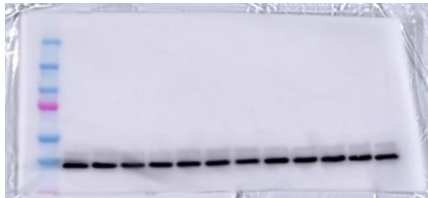

CLDN-1 ~22kDa Rabbit Thermo 51-9000

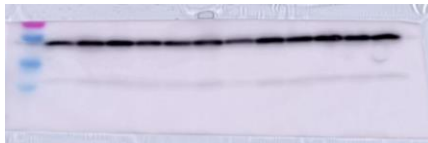

Ponceau S staining

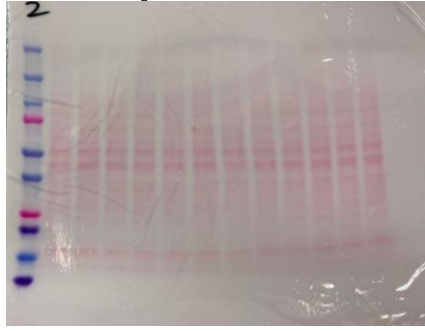

GAPDH ~36kDa Rabbit CST 5174S 1: 2000

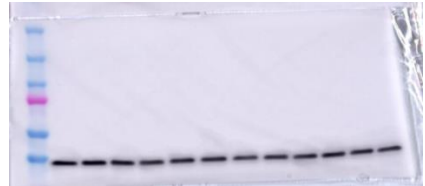

CLDN2 ~22kDa Mouse Thermo 32-5600 1:400

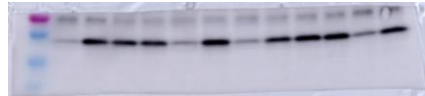

Occludin ~65kDa Mouse Thermo 331500 1:1000

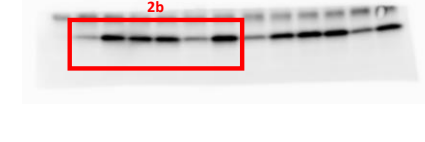

ZO-1 ~220kDa Rabbit Thermo 61-7300 1:500

Ponceau S staining

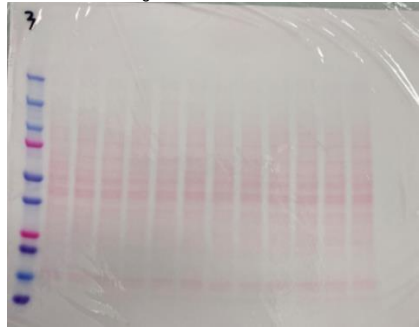

GAPDH ~36kDa Rabbit CST 5174S 1: 2000

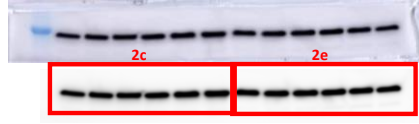

CLDN-3 ~22kDa Rabbit Thermo 34-1700 1:500

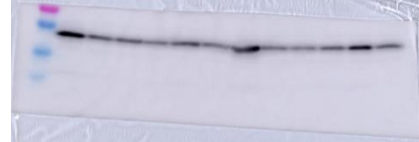

Occludin ~65kDa Mouse Thermo 331500 1:1000

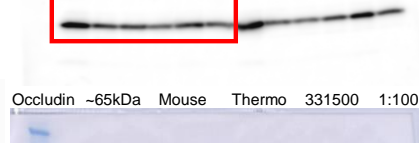

ZO-1 ~220kDa Rabbit Thermo 61-7300 1:500

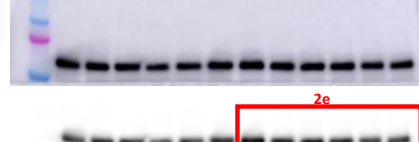

ZO-1 ~220kDa Rabbit Thermo 61-7300 1:500

Ponceau S staining

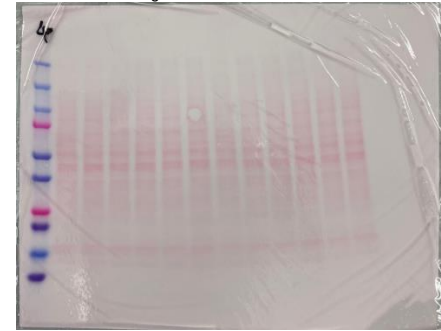

GAPDH ~36kDa Rabbit CST 5174S 1: 2000

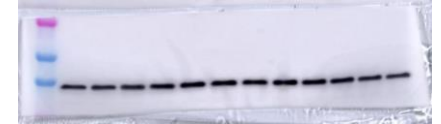

CLDN-4 ~22kDa Mouse Thermo 32-9400 1:500

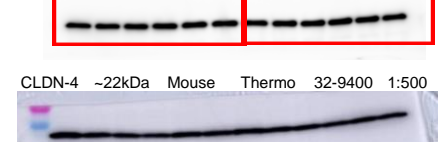

Occludin ~65kDa Mouse Thermo 331500 1:1000

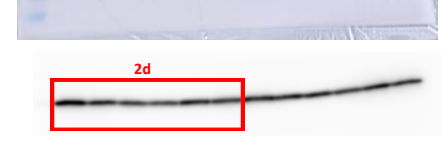

ZO-1 ~220kDa Rabbit Thermo 61-7300 1:500

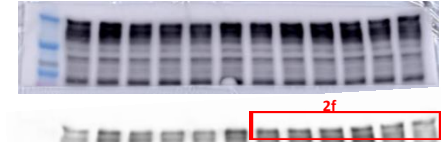

ZO-1 ~220kDa Rabbit Thermo 61-7300 1:500

**First experiment**

|                |                |                |                |                |                |                |                |                |                |
|----------------|----------------|----------------|----------------|----------------|----------------|----------------|----------------|----------------|----------------|
|                | TNF- $\alpha$  | TNF- $\alpha$  | TNF- $\alpha$  | TNF- $\alpha$  |                | TNF- $\alpha$  | TNF- $\alpha$  | TNF- $\alpha$  | TNF- $\alpha$  |
|                | /IFN- $\gamma$ | /IFN- $\gamma$ | /IFN- $\gamma$ | /IFN- $\gamma$ |                | /IFN- $\gamma$ | /IFN- $\gamma$ | /IFN- $\gamma$ | /IFN- $\gamma$ |
| TNF- $\alpha$  | 10ng/ml+       | 10ng/ml+       | 10ng/ml+       | 10ng/ml+       | TNF- $\alpha$  | 10ng/ml+       | 10ng/ml+       | 10ng/ml+       | 10ng/ml+       |
| /IFN- $\gamma$ | acetate        | propiona       | butyrate       | succinat       | /IFN- $\gamma$ | acetate        | propiona       | butyrate       | succinat       |
| Control        | 10ng/ml        | 2mM            | te 2mM         | 2mM e 2mM      | Control        | 10ng/ml        | 2mM            | te 2mM         | 2mM e 2mM      |

The membrane was cut in blotting, so ponceau staining was also shown here to confirm that pieces are form same membrane.

Ponceau S staining

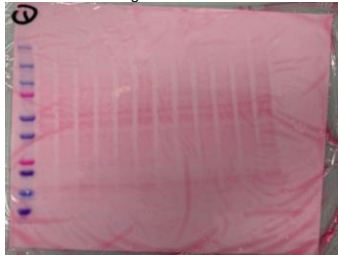

GAPDH ~36kDa Rabbit CST 5174S 1: 2000

Ponceau S staining

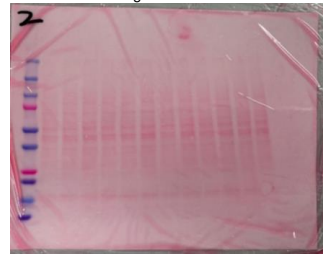

GAPDH ~36kDa Rabbit CST 5174S 1: 2000

Ponceau S staining

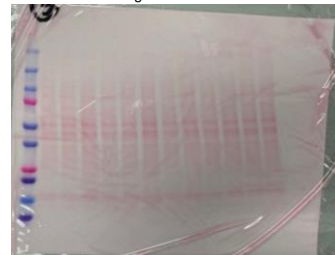

GAPDH ~36kDa Rabbit CST 5174S 1: 2000

Ponceau S staining

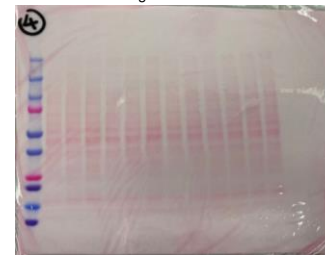

GAPDH ~36kDa Rabbit CST 5174S 1: 2000

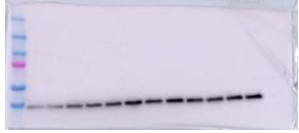

CLDN-4 ~22kDa Mouse Thermo 32-9400 1:500

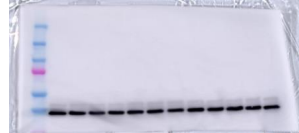

CLDN-1 ~22kDa Rabbit Thermo 51-9000 1:250

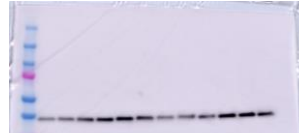

CLDN-3 ~22kDa Rabbit Thermo 34-1700 1:500

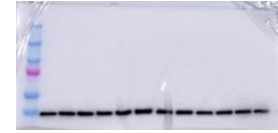

CLDN2 ~22kDa Mouse Thermo 32-5600 1:400

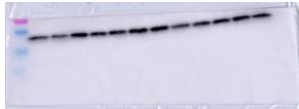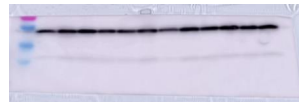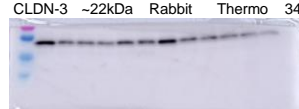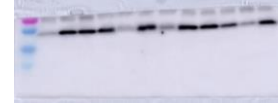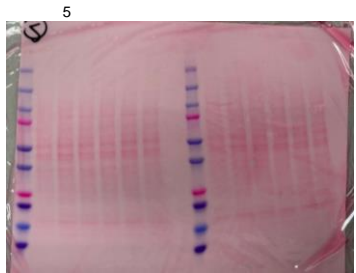

GAPDH ~36kDa Rabbit CST 5174S 1: 2000

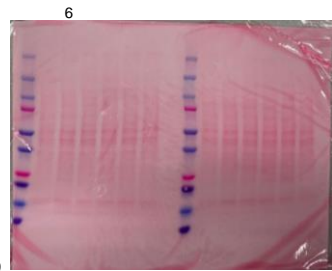

GAPDH ~36kDa Rabbit CST 5174S 1: 2000

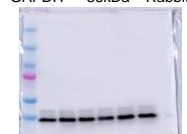

CLDN-1 ~22kDa Rabbit

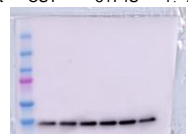

CLDN-4 ~22kDa Mouse

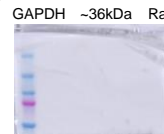

CLDN2 ~22kDa Mouse

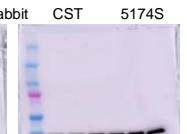

CLDN-3 ~22kDa Rabbit

**Second repeat**

|                |                |                |                |                |         |                |                |                |                |
|----------------|----------------|----------------|----------------|----------------|---------|----------------|----------------|----------------|----------------|
|                | TNF- $\alpha$  | TNF- $\alpha$  | TNF- $\alpha$  | TNF- $\alpha$  |         | TNF- $\alpha$  | TNF- $\alpha$  | TNF- $\alpha$  | TNF- $\alpha$  |
|                | /IFN- $\gamma$ | /IFN- $\gamma$ | /IFN- $\gamma$ | /IFN- $\gamma$ |         | /IFN- $\gamma$ | /IFN- $\gamma$ | /IFN- $\gamma$ | /IFN- $\gamma$ |
|                | 10ng/ml+       | 10ng/ml+       | 10ng/ml+       | 10ng/ml+       |         | 10ng/ml+       | 10ng/ml+       | 10ng/ml+       | 10ng/ml+       |
| TNF- $\alpha$  | acetate        | propionat      | butyrate       | succinat       | Control | acetate        | propionat      | butyrate       | succinat       |
| /IFN- $\gamma$ | 2mM            | e 2mM          | 2mM            | e 2mM          | Control | 2mM            | e 2mM          | 2mM            | e 2mM          |
| Control        | 10ng/ml        | 2mM            | e 2mM          | 2mM            | e 2mM   | 10ng/ml        | 2mM            | e 2mM          | 2mM            |

The membrane was cut in blotting, so ponceau staining was also shown here to confirm that pieces are form same membrane.

Ponceau S staining

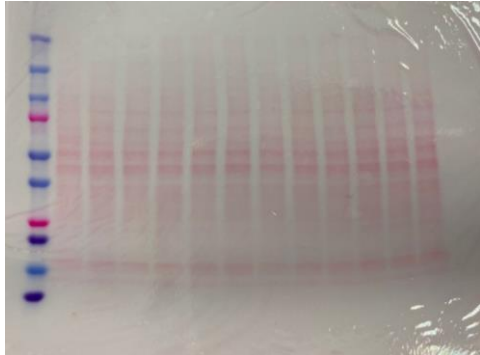

GAPDH ~36kDa Rabbit CST 5174S 1: 2000

Ponceau S staining

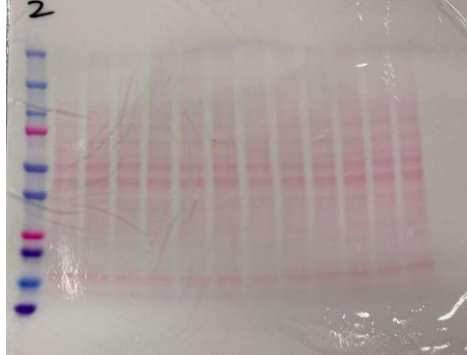

GAPDH ~36kDa Rabbit CST 5174S 1: 2000

Ponceau S staining

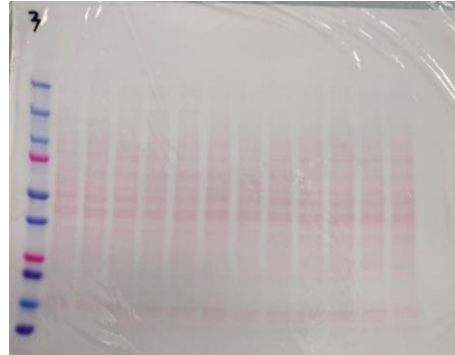

GAPDH ~36kDa Rabbit CST 5174S 1: 2000

Ponceau S staining

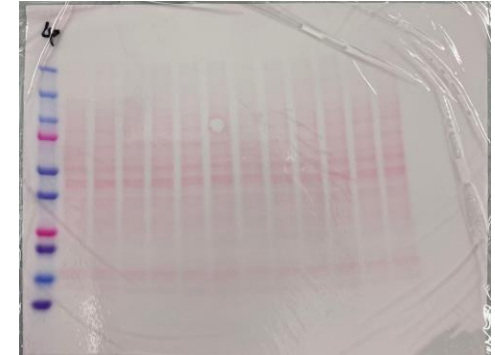

GAPDH ~36kDa Rabbit CST 5174S 1: 2000

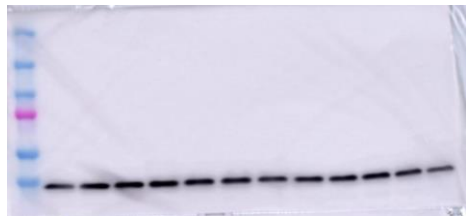

CLDN-1 ~22kDa Rabbit Thermo 51-9000 1:250

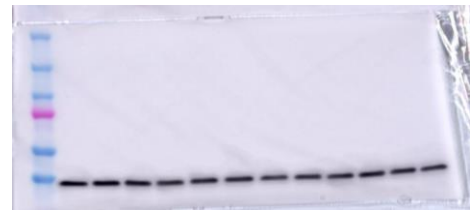

CLDN2 ~22kDa Mouse Thermo 32-5600 1:400

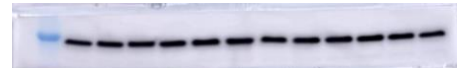

CLDN-3 ~22kDa Rabbit Thermo 34-1700 1:500

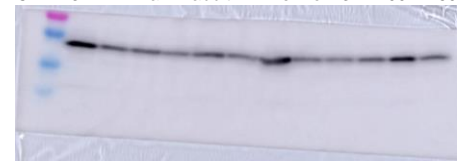

Occludin ~65kDa Mouse Thermo 331500 1:1000

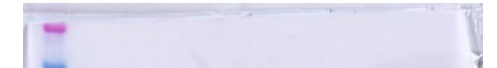

CLDN-4 ~22kDa Mouse Thermo 32-9400 1:500

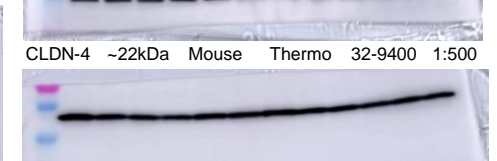

ZO-1 ~220kDa Rabbit Thermo 61-7300 1:500

**Third repeat**

|         |                 |          |                 |          |     |         |
|---------|-----------------|----------|-----------------|----------|-----|---------|
|         | TNF- $\alpha$   |          | TNF- $\alpha$   |          |     |         |
|         | //IFN- $\gamma$ |          | //IFN- $\gamma$ |          |     |         |
|         | TNF- $\alpha$   | 10ng/ml+ | TNF- $\alpha$   | 10ng/ml+ |     |         |
|         | //IFN- $\gamma$ | butyrate | //IFN- $\gamma$ | butyrate |     |         |
| Control | 10ng/ml         | 2mM      | Control         | 10ng/ml  | 2mM | PC1 PC2 |

The membrane was cut in blotting, so ponceau staining was also shown here to confirm that pieces are from same membrane.

Ponceau S staining

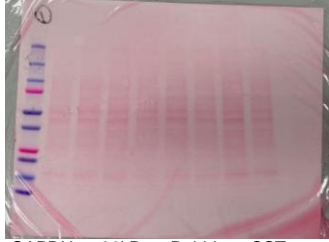

GAPDH ~36kDa Rabbit CST 5174S 1: 2000

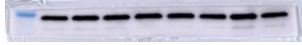

CLDN-1 ~22kDa Rabbit Thermo 51-9000 1:250

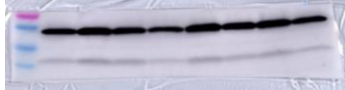

Ponceau S staining

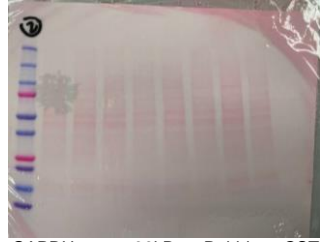

GAPDH ~36kDa Rabbit CST 5174S 1: 2000

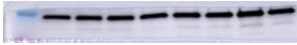

CLDN2 ~22kDa Mouse Thermo 32-5600 1:250

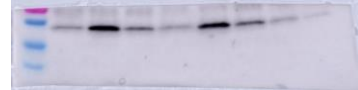

Ponceau S staining

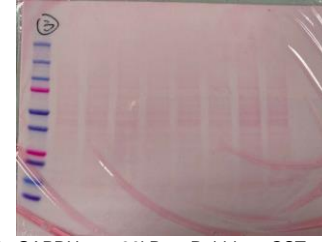

GAPDH ~36kDa Rabbit CST 5174S 1: 2000

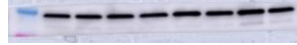

ZO-1 ~220kDa Rabbit Thermo 61-7300 1:500

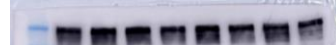

CLDN-3 ~22kDa Rabbit Thermo 34-1700 1:500

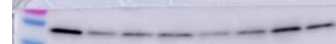

CLDN-4 ~22kDa Mouse Thermo 32-9400 1:500

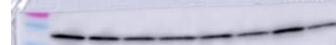

Ponceau S staining

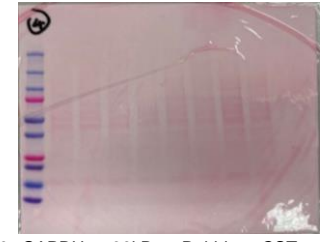

GAPDH ~36kDa Rabbit CST 5174S 1: 2000

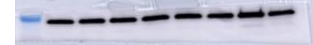

Occludin ~65kDa Mouse Thermo 331500 1:1000

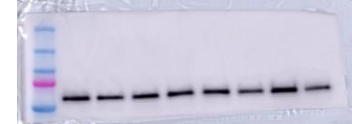

**Supplementary Figure S2.** The effect of different concentrations of acetate, propionate and succinate on TNF- $\alpha$ /IFN- $\gamma$ - and IL-13-induced barrier dysfunction. \*\*\*\*  $p < 0.0001$  compared to medium-treated control.

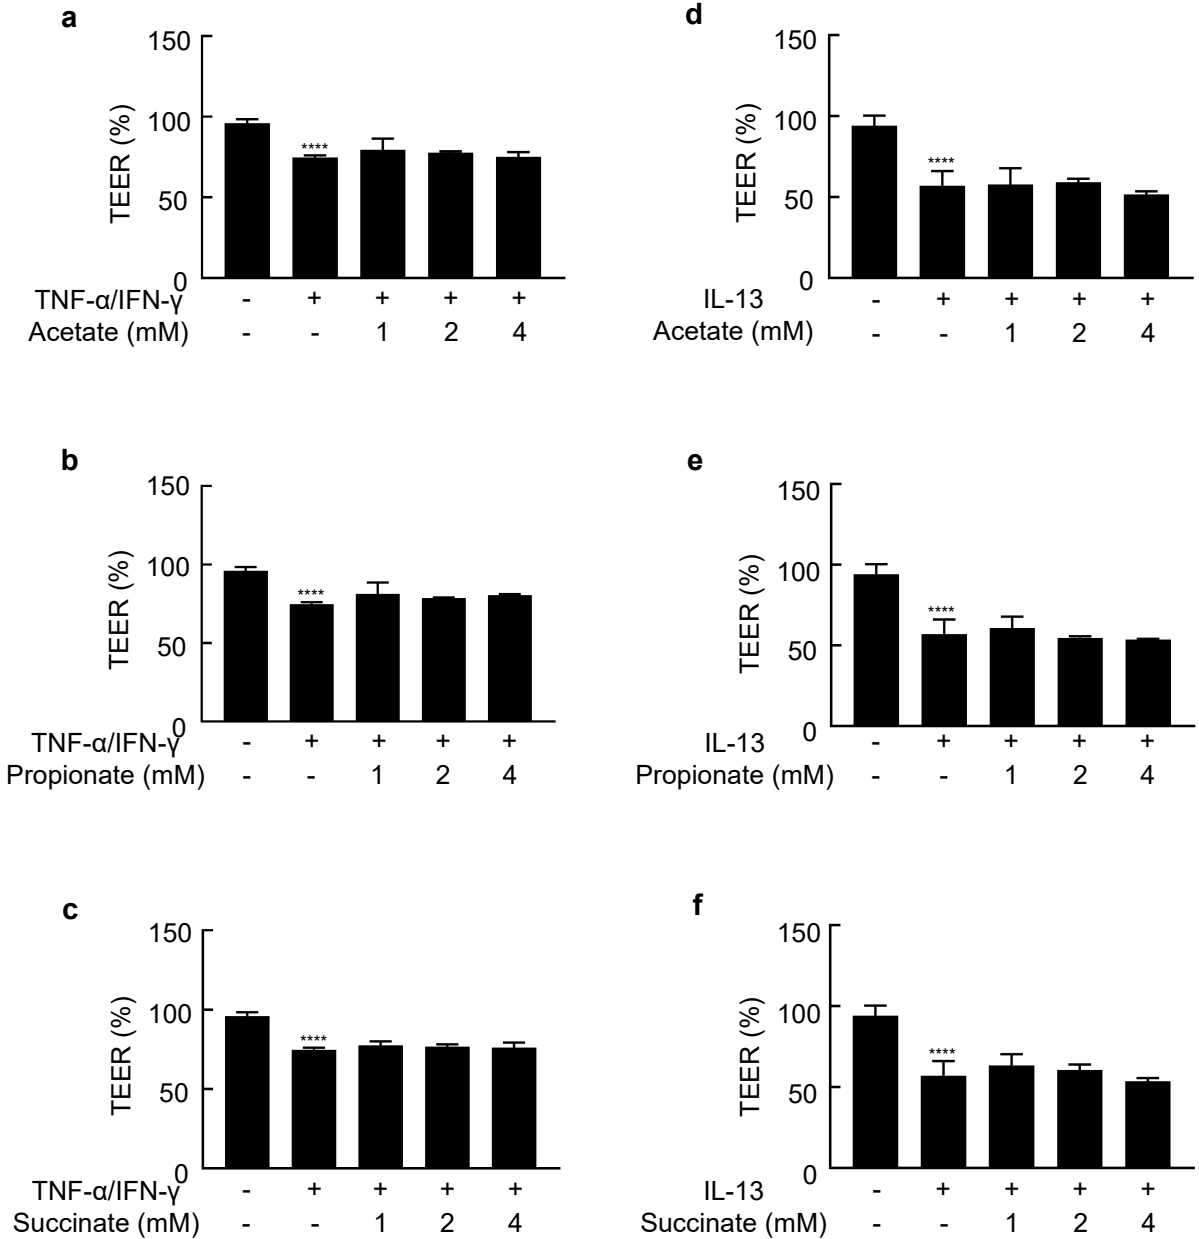

**Supplementary Figure S3. Full membranes of Western blotting for Figure 4.**

**Bands (Membranes) in the manuscript**

ImageQuant; AS 500 was used to capture chemiluminescence. Color picture and Monochrome pictures will be generated automatically. Monochrome pictures were analysed by ImageJ.

The membrane was cut in blotting, so ponceau staining was also shown here to confirm that pieces are from same membrane.

| Lane order: | Control | IL-13 10ng/ml | IL-13 10ng/ml+ butyrate 2mM | Control | IL-13 10ng/ml | IL-13 10ng/ml+ butyrate 2mM | Control | IL-13 10ng/ml | IL-13 10ng/ml+ butyrate 2mM |
|-------------|---------|---------------|-----------------------------|---------|---------------|-----------------------------|---------|---------------|-----------------------------|
|-------------|---------|---------------|-----------------------------|---------|---------------|-----------------------------|---------|---------------|-----------------------------|

Ponceau S staining

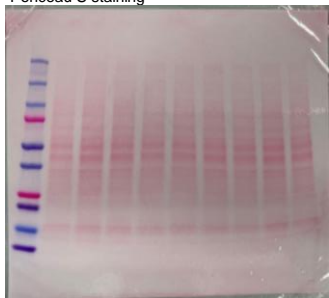

GAPDH ~36kDa Rabbit CST 5174S

Ponceau S staining

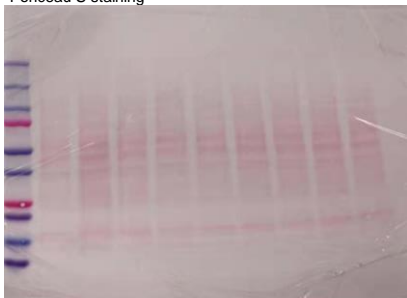

GAPDH ~36kDa Rabbit CST 5174S 1:2000

Ponceau S staining

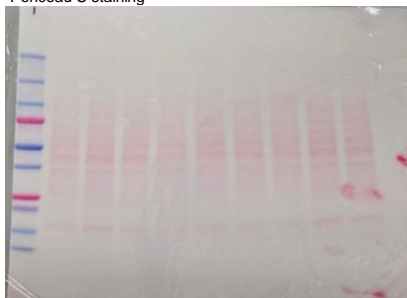

GAPDH ~36kDa Rabbit CST 5174S 1:2000

Ponceau S staining

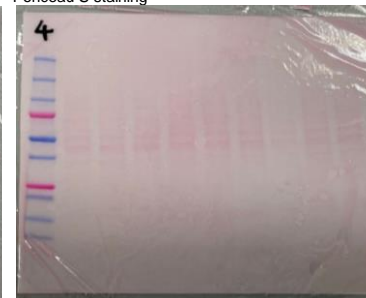

GAPDH ~36kDa Rabbit CST 5174S 1:2000

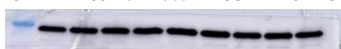

Occludin ~65kDa Mouse Thermo 331500

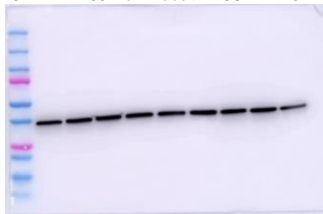

Occludin ~65kDa Mouse Thermo 331500 1:1000

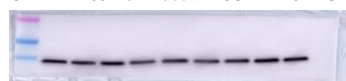

CLDN-3 ~22kDa Rabbit Thermo 34-1700 1:500

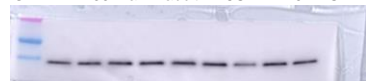

CLDN-4 ~22kDa Mouse Thermo 32-9400 1:500

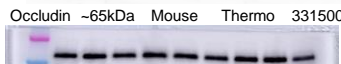

Occludin ~65kDa Mouse Thermo 331500 1:1000

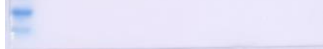

Occludin ~65kDa Mouse Thermo 331500 1:1000

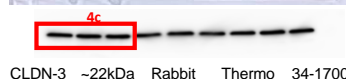

CLDN-3 ~22kDa Rabbit Thermo 34-1700 1:500

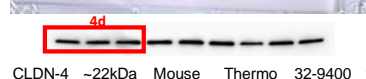

CLDN-4 ~22kDa Mouse Thermo 32-9400 1:500

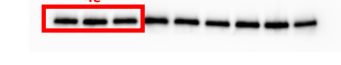

CLDN-1 ~22kDa Rabbit Thermo 51-9000 1:250

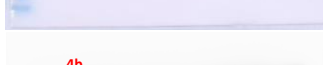

CLDN-1 ~22kDa Rabbit Thermo 51-9000 1:250

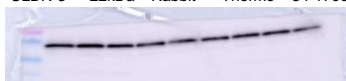

CLDN-3 ~22kDa Rabbit Thermo 34-1700 1:500

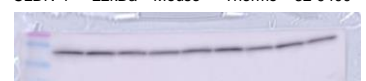

CLDN-4 ~22kDa Mouse Thermo 32-9400 1:500

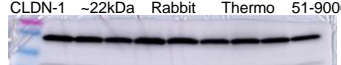

CLDN-1 ~22kDa Rabbit Thermo 51-9000 1:250

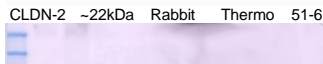

CLDN-2 ~22kDa Rabbit Thermo 51-6100 1:250

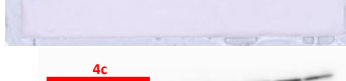

CLDN-3 ~22kDa Rabbit Thermo 34-1700 1:500

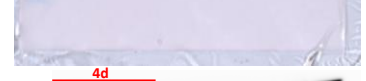

CLDN-4 ~22kDa Mouse Thermo 32-9400 1:500

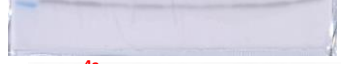

CLDN-1 ~22kDa Rabbit Thermo 51-9000 1:250

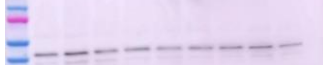

CLDN-2 ~22kDa Rabbit Thermo 51-6100 1:250

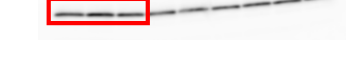

CLDN-3 ~22kDa Rabbit Thermo 34-1700 1:500

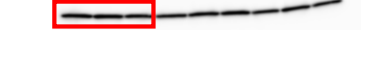

CLDN-4 ~22kDa Mouse Thermo 32-9400 1:500

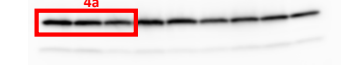

CLDN-1 ~22kDa Rabbit Thermo 51-9000 1:250

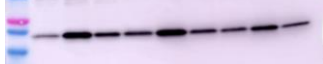

CLDN-2 ~22kDa Rabbit Thermo 51-6100 1:250

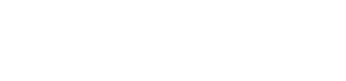

CLDN-3 ~22kDa Rabbit Thermo 34-1700 1:500

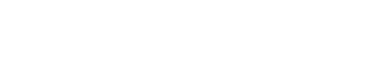

CLDN-4 ~22kDa Mouse Thermo 32-9400 1:500

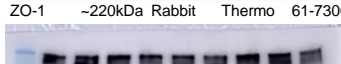

ZO-1 ~220kDa Rabbit Thermo 61-7300 1:500

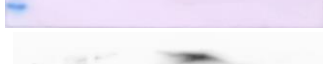

ZO-1 ~220kDa Rabbit Thermo 61-7300 1:500

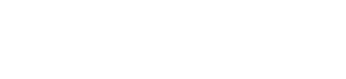

ZO-1 ~220kDa Rabbit Thermo 61-7300 1:500

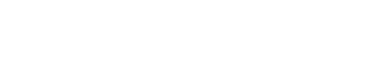

ZO-1 ~220kDa Rabbit Thermo 61-7300 1:500

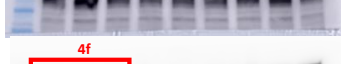

ZO-1 ~220kDa Rabbit Thermo 61-7300 1:500

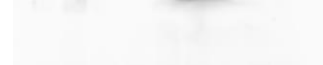

ZO-1 ~220kDa Rabbit Thermo 61-7300 1:500



ZO-1 ~220kDa Rabbit Thermo 61-7300 1:500



ZO-1 ~220kDa Rabbit Thermo 61-7300 1:500

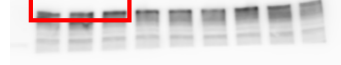

ZO-1 ~220kDa Rabbit Thermo 61-7300 1:500

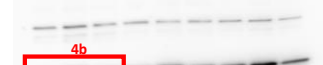

ZO-1 ~220kDa Rabbit Thermo 61-7300 1:500



ZO-1 ~220kDa Rabbit Thermo 61-7300 1:500



ZO-1 ~220kDa Rabbit Thermo 61-7300 1:500

**First experiment**

Lane IL-13 10ng/ml+ butyrate 2mM Control  
 order: Control 10ng/ml 2mM Control 10ng/ml 2mM  
 Ponceau S

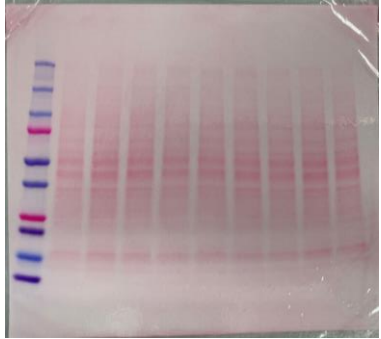

Occludin ~65kDa Mouse Thermo 331500 1:1000

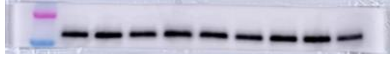

CLDN-1 ~22kDa Rabbit Thermo 51-9000 1:250

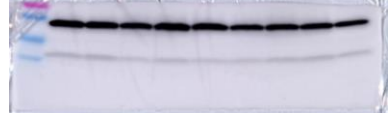

ZO-1 ~220kDa Rabbit Thermo 61-7300 1:500

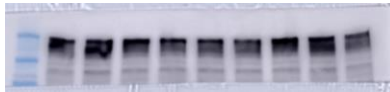

GAPDH ~36kDa Rabbit CST 5174S 1: 2000

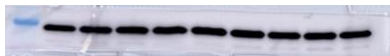

IL-13 10ng/ml+ butyrate 2mM Control 10ng/ml 2mM  
 IL-13 10ng/ml+ butyrate 2mM Control 10ng/ml 2mM  
 Ponceau S staining

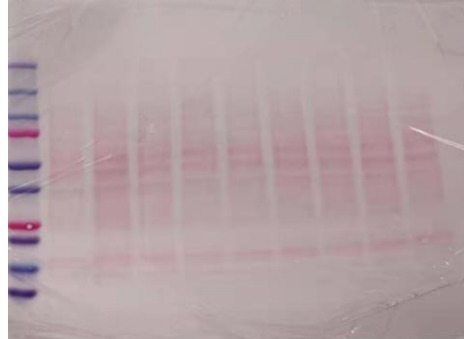

CLDN-2 ~22kDa Rabbit Thermo 51-6100 1:250

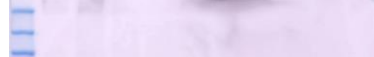

GAPDH ~36kDa Rabbit CST 5174S 1:1000

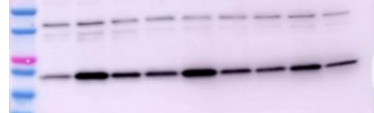

GAPDH ~36kDa Rabbit CST 5174S 1:1000

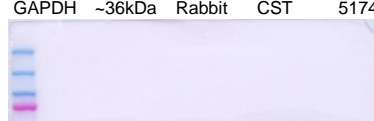

Ponceau S staining

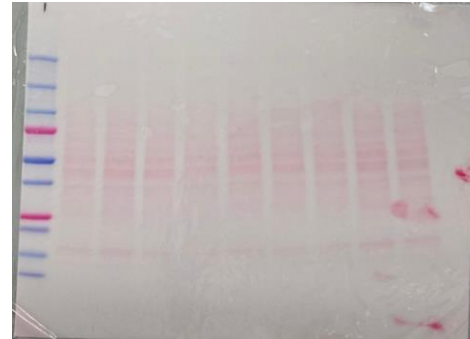

GAPDH ~36kDa Rabbit CST 5174S 1: 2000

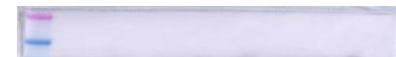

CLDN-3 ~22kDa Rabbit Thermo 34-1700 1:500

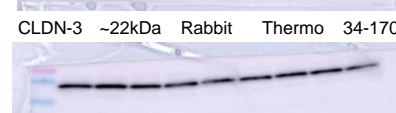

GAPDH ~36kDa Rabbit CST 5174S 1:1000

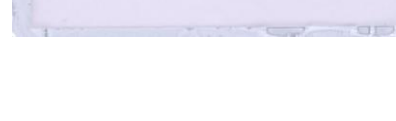

GAPDH ~36kDa Rabbit CST 5174S 1: 2000

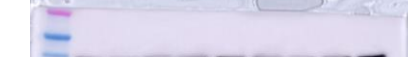

CLDN-4 ~22kDa Mouse Thermo 32-9400 1:500

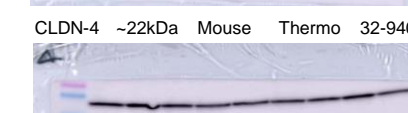

GAPDH ~36kDa Rabbit CST 5174S 1:1000

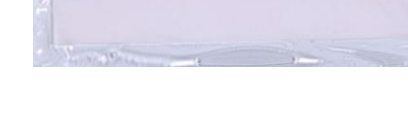

**Second repeat**

|        |         |                   |         |         |                   |         |                   |          |
|--------|---------|-------------------|---------|---------|-------------------|---------|-------------------|----------|
|        |         | IL-13<br>10ng/ml+ |         |         | IL-13<br>10ng/ml+ |         | IL-13<br>10ng/ml+ |          |
| Lane   | IL-13   | butyrate          | Control | IL-13   | butyrate          | Control | IL-13             | butyrate |
| order: | Control | 10ng/ml           | 2mM     | 10ng/ml | 2mM               | Control | 10ng/ml           | 2mM      |

Ponceau S staining

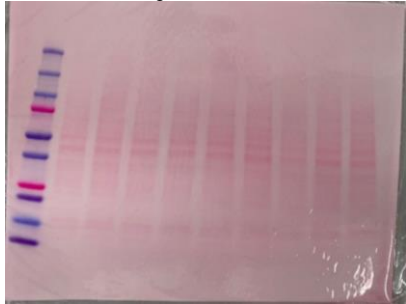

CLDN-1 ~22kDa Rabbit Thermo 51-9000 1:250

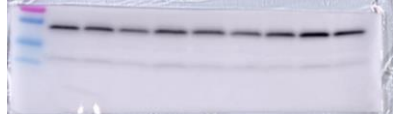

GAPDH ~36kDa Rabbit CST 5174S 1: 2000

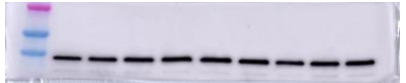

Ponceau S staining

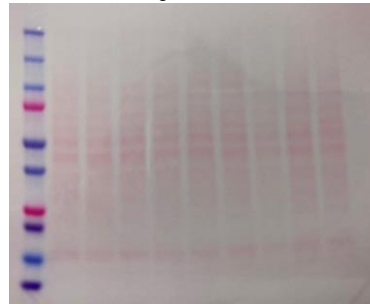

CLDN-2 ~22kDa Rabbit Thermo 51-6100 1:250

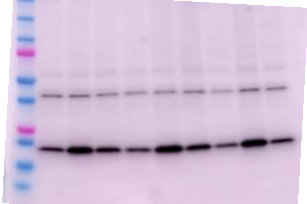

GAPDH ~36kDa Rabbit CST 5174S 1:1000

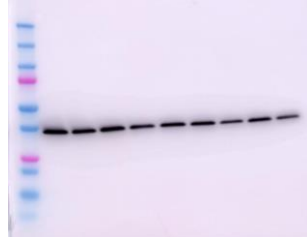

Occludin ~65kDa Mouse Thermo 331500 1:1000

Ponceau S staining

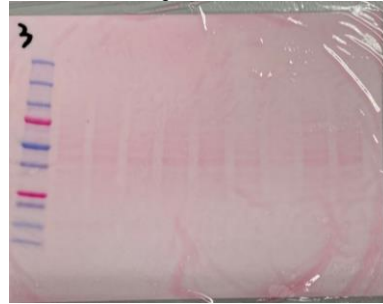

GAPDH ~36kDa Rabbit CST 5174S 1: 2000

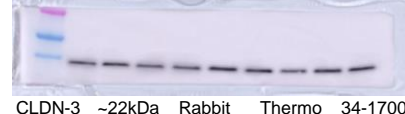

CLDN-3 ~22kDa Rabbit Thermo 34-1700 1:500

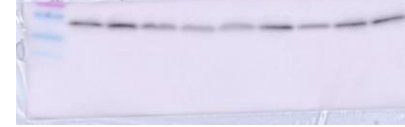

Ponceau S staining

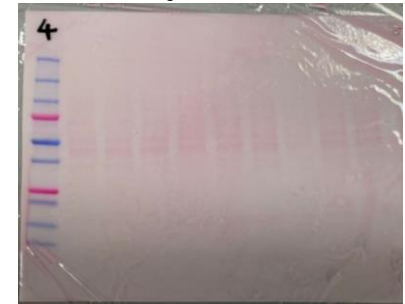

GAPDH ~36kDa Rabbit CST 5174S 1: 2000

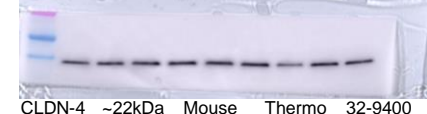

CLDN-4 ~22kDa Mouse Thermo 32-9400 1:500

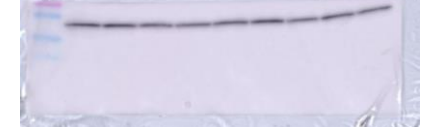



Third repeat

|             |                  |         |               |                            |                               |                             |                              |                  |         |               |                            |                               |                             |                              |
|-------------|------------------|---------|---------------|----------------------------|-------------------------------|-----------------------------|------------------------------|------------------|---------|---------------|----------------------------|-------------------------------|-----------------------------|------------------------------|
| Lane order: | Positive control | Control | IL-13 10ng/ml | IL-13 10ng/ml+ acetate 2mM | IL-13 10ng/ml+ propionate 2mM | IL-13 10ng/ml+ butyrate 2mM | IL-13 10ng/ml+ succinate 2mM | Positive control | Control | IL-13 10ng/ml | IL-13 10ng/ml+ acetate 2mM | IL-13 10ng/ml+ propionate 2mM | IL-13 10ng/ml+ butyrate 2mM | IL-13 10ng/ml+ succinate 2mM |
|-------------|------------------|---------|---------------|----------------------------|-------------------------------|-----------------------------|------------------------------|------------------|---------|---------------|----------------------------|-------------------------------|-----------------------------|------------------------------|

Ponceau S staining

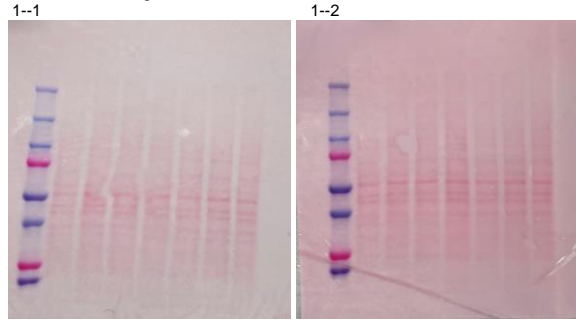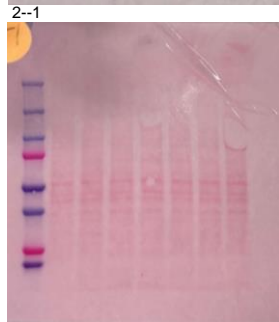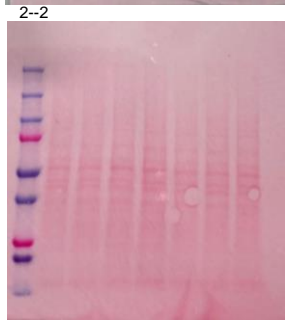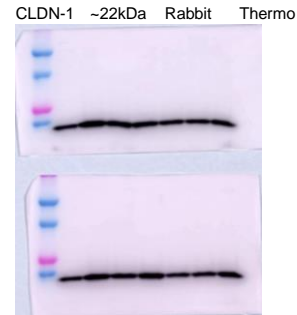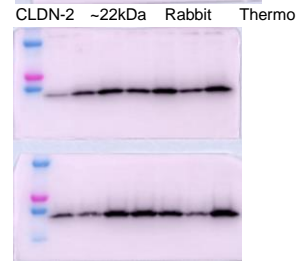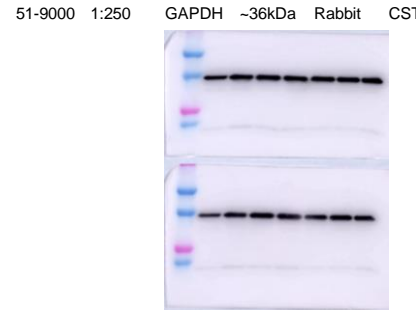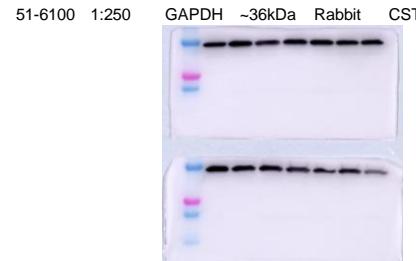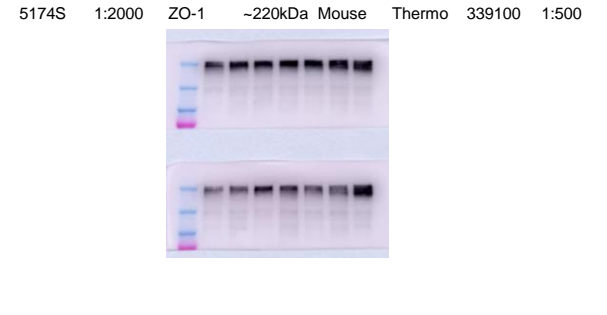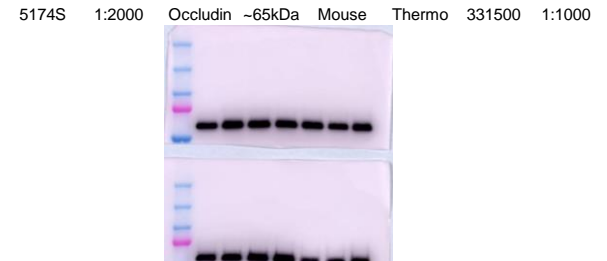

|        |        |        |        |         |       |       |        |        |     |       |        |      |         |       |        |        |       |
|--------|--------|--------|--------|---------|-------|-------|--------|--------|-----|-------|--------|------|---------|-------|--------|--------|-------|
| CLDN-1 | ~22kDa | Rabbit | Thermo | 51-9000 | 1:250 | GAPDH | ~36kDa | Rabbit | CST | 5174S | 1:2000 | ZO-1 | ~220kDa | Mouse | Thermo | 339100 | 1:500 |
|--------|--------|--------|--------|---------|-------|-------|--------|--------|-----|-------|--------|------|---------|-------|--------|--------|-------|

|        |        |        |        |         |       |       |        |        |     |       |        |          |        |       |        |        |        |
|--------|--------|--------|--------|---------|-------|-------|--------|--------|-----|-------|--------|----------|--------|-------|--------|--------|--------|
| CLDN-2 | ~22kDa | Rabbit | Thermo | 51-6100 | 1:250 | GAPDH | ~36kDa | Rabbit | CST | 5174S | 1:2000 | Occludin | ~65kDa | Mouse | Thermo | 331500 | 1:1000 |
|--------|--------|--------|--------|---------|-------|-------|--------|--------|-----|-------|--------|----------|--------|-------|--------|--------|--------|
